# Supplementary material
Source: HighWire-hosted journal article supplement (doi:10.1101/rna.078768.121)
Supplement: Supplemental_Figure_Legends_.docx [file Supplemental_Figure_Legends_.docx]

**SUPPLEMENTAL FIGURE LEGENDS**

**Supplemental Figure 1: The human genome contains more than a thousand snRNA gene loci.**

**(A)** A schematic of a phylogenetic tree of a subset of primate species, adapted from the Primate Information Network at the University of Wisconsin-Madison (https://primate.wisc.edu/primate-info-net). Asterisks indicate the species with elevated numbers of U4 snRNA genes.

**(B)** Human chromosome karyograms showing the location of all annotated U1, U2, U4, and U5 snRNA genes. The U6 genes are omitted for clarity. Bands indicate the genomic position of each gene. snRNA gene colors are shown at bottom, with the canonical genes and the largest cluster of U1 variants indicated on the karyogram. Dots indicate the genomic position of snRNA genes detectably expressed in the human cell lines or tissues tested herein.

**Supplemental Figure 2: Presence of human snRNA variants in small RNA-seq libraries.**

Sequencing read alignments of snRNA genes from small RNA-sequencing datasets (Djebali et al., 2012, Marshall et al., 2017). Read coverage density (grey bars) across the entire snRNA-coding sequence (arrow) are shown as reads per million (RPM). Gene name and genomic location of each snRNA variant gene is shown below the RNA-coding region. Colored bars indicate nucleotides (top) that deviate from the canonical snRNA sequence. snRNA genes: **(A)** U1, **(B)** U2, **(C)** U4, **(D)** U5.

**Supplemental Figure 3: Sanger sequencing validation of expressed snRNA variants.**

Sanger sequencing traces of snRNA variants amplified by variant-specific RT-PCR. Sequencing traces are shown below the bases called. Black lines under the sequence indicate the position of the gene-specific PCR primers. Asterisks indicate nucleotides that differ from the corresponding canonical snRNA and nucleotides noted above the called bases are those expected but not observed. For genes names in red (left) the amplicons did not match the expected sequence, so the genes were excluded from the study. snRNA genes: **(A)** U1, **(B)** U2, **(C)** U4, **(D)** U5.

**Supplemental Figure 4: Differential cell line expression of snRNA sequence variants.**

**(A)** Table of the canonical major and minor snRNA genes, their haploid copy number (gene dosage) and their percent expression relative to U1-1 in 293T cells by RT-qPCR. Three technical replicates were run for each sample. The gene dosage of U2-1 is variable due to expansion or contraction of tandemly repeated genes (Van Arsdell & Weiner, 1984).

**(B)** Heatmap of the relative expression of each snRNA gene (left) across human cell lines (bottom) by RT-qPCR. All snRNA variants were normalized to the median expression of RN7SK, RN7SL1 and 5S rRNA (2-ΔCt) within each cell line (as in **Figure 2C** and **D**). Relative fold expression of snRNAs across each cell line is displayed (2-ΔΔCt). snRNA genes were hierarchically clustered based on their expression profiles (right). Four distinct clusters are shown: high expression (red), medium expression (orange), low expression (yellow) and very low to no expression (grey). Three technical replicates were run for each sample.

**Supplemental Figure 5: Sequence alignment of snRNA variant genes.**

Genomic sequence alignment of coding regions of canonical snRNA genes and snRNA variant genes found to be expressed by RT-qPCR in human cell lines. Secondary structure elements are indicated above the sequence. The nucleotide position relative to the canonical snRNA gene is shown above each alignment. Blue shading is proportional to sequence similarity across the aligned sequences. Percent sequence identity for each nucleotide is shown as a histogram below the sequences. Sequences that are important for RNA:protein or RNA:RNA interactions are highlighted in the histogram. snRNA genes: **(A)** U1, **(B)** U2, **(C)** U4, **(D)** U5. Previously identified U5 snRNA variants are bolded (Sontheimer & Steitz, 1992). Novel expressed U5 snRNAs (U5A-8P, U5E-4P, U5E-6P) are indicated by asterisks. **(E)** Sequence alignment of canonical snRNA Sm binding sites.

**Supplemental Figure 6: Sequence alignment of snRNA variant gene promoters.**

Sequence alignment of snRNA variant gene promoters to their canonical snRNA gene: *left,* distal sequence element (DSE) and *right,* proximal sequence element (PSE). Sequences of known transcription factor binding sites are shown above and are indicated in the percent sequence identity histogram below. Blue shading is proportional to sequence similarity across the aligned sequences. snRNA genes: **(A)** U1, **(B)** U2, **(C)** U4, **(D)** U5. **(E)** Scatter plot comparing the rank order of the promoter consensus (mean rank order of PSE and DSE based on Supplemental Figure 6A-D) versus the rank order of the relative expression as compared to the canonical snRNA gene (based on rank order from Figure 2C). Linear regression lines and correlation coefficients (R) are indicated for each snRNA using the color scheme above. The number of snRNA genes in each gene family is indicated in parentheses.

**Supplemental Figure 7: Variant snRNAs generate variant snRNPs and spliceosomes.**

**(A)** Western blot analysis of 293T cell equivalents of cytoplasmic and nuclear fractions. GAPDH is primarily localized in the cytosol and shows very little nuclear signal. Chromatin associated HP1A is strongly enriched in the nuclear fraction. The different gel mobility of HP1A from nuclear and cytoplasmic fractions is likely due to nuclear post-translational modifications required for chromatin association (Nishibuchi et al., 2014). The positions of molecular mass markers (in kDa) are on the left.

**(B)** Western blot analysis of Y12 IP of Sm from 293T cell extract. Shown is the amount of SmB/B′ in the immunoprecipitates of non-immune IgG (lane 2) or Y12 (lane 3), as compared to that in 1.5% of the equivalent volume of total 293T cell extract (TE). SmB/B′ and IgG light chain protein bands are indicated on the right. The positions of molecular mass markers (in kDa) are on the left.

**(C)** Percent relative levels of snRNA variants in anti-Sm (Y12) IP by RT-qPCR. The level of the variant snRNAs was normalized to the respective canonical snRNA (2-ΔCt) and U6 was compared to U4-1. Error bars represent the standard error of the mean (SEM) of three technical replicates of Sm IPs from human 293T cells. Variants that were not found to co-IP with Y12 are indicated by an ellipsis. The x-axis is log10 scaled.

**(D)** (*Top*) Northern blot analysis of 293T nuclear lysates run on a 10-30% glycerol gradient. RNA was isolated from the odd numbered fractions indicated above each lane, separated by 6.5% denaturing PAGE, blotted, and probed using IRDye800-conjugated DNA probes complementary to the canonical snRNAs (U1, U2, U4, U5A, U6). The positions of RNA length markers are indicated at left. RNA distribution was used to deduce the snRNP and spliceosomal fractions noted above.

(*Bottom*) Western blot analysis of the same glycerol gradient used for the Northern blot. Proteins isolated from even numbered gradient fractions were separated by 12% SDS-PAGE, blotted, and probed with antibodies against the indicated proteins. Prp8 and Snu114 are U5 snRNP proteins, Prp4 is a U4 snRNP protein, and Prp19 is a non-snRNP component of activated spliceosomes.

**(E)** Percent relative levels of snRNA variants from corresponding snRNP (*left*) or spliceosome (*right*) gradient fractions by RT-qPCR. The level of the variant snRNAs was normalized to the respective canonical snRNA (2-ΔCt) except for U6 and U6atac, which were normalized to U4-1. Error bars represent the standard error of the mean (SEM) of three technical replicates. Variants that were not found to co-sediment are indicated by an ellipsis. The x-axis is log10 scaled.

**SUPPLEMENTAL REFERENCES**

Nishibuchi G, Machida S, Osakabe A, Murakoshi H, Hiragami-Hamada K, Nakagawa R, Fischle W, Nishimura Y, Kurumizaka H, Tagami H, Nakayama J. 2014. N-terminal phosphorylation of HP1α increases its nucleosome-binding specificity. *Nucleic Acids Res* **42**: 12498-511.

Van Arsdell SW, Weiner AM. 1984. Human genes for U2 small nuclear RNA are tandemly repeated. *Mol Cell Biol* **4**: 492-499.
